# Supplementary material for: Magnetic solid-phase extraction based on tetrabenzyl modified Fe3O4 nanoparticles for the analysis of trace polycyclic aromatic hydrocarbons in environmental water samples
Source: Royal Society of Chemistry journal article supplement (doi:10.1039/c3an01027a), 2013-01-01
Supplement: c3an01027a.pdf [file c3an01027a.pdf]

1 **Magnetic solid-phase extraction based on tetrabenzyl modified Fe<sub>3</sub>O<sub>4</sub>**  
2 **nanoparticles for the analysis of trace polycyclic aromatic**  
3 **hydrocarbons in environmental water samples**

4 **Ying Zou, Yingzhuang Chen, Zhihong Yan, Chunyan Chen, Jianping Wang,**  
5 **Shouzhuo Yao\***

6 *E-mail: szyao@hnu.edu.cn; Fax: +86-731-88821968*

7

8

9

10 **Supplementary Materials**

11

12 **2. Experimental**

13 **2.5. HPLC-FLD analysis**

14 Table S-1 Time program of emission and excitation wavelength of fluorescence  
15 detection

| Time (min) | Emission (nm) | Excitation (nm) | PAH determined |
|------------|---------------|-----------------|----------------|
| 0.0-12.0   | 340           | 260             | Flu            |
| 12.0-15.0  | 370           | 250             | Ant            |
| 15.0-17.5  | 462           | 289             | FlA            |
| 17.5-21.0  | 380           | 320             | Pyr            |
| 21.0-25.0  | 403           | 266             | BaA            |
| 25.0-32.0  | 430           | 294             | BbF, BkF       |

16

17

18

19

20

21

22

23

### 24 3. Results and Discussion

#### 25 3.1. Characterization of as-synthesized magnetic nanoparticles

26 Figure S-1 XRD spectra of (A) naked  $\text{Fe}_3\text{O}_4$ , (B)  $\text{Fe}_3\text{O}_4/\text{SiO}_2$  and (C)  
27  $\text{Fe}_3\text{O}_4/\text{SiO}_2/\text{TBCD}$ .

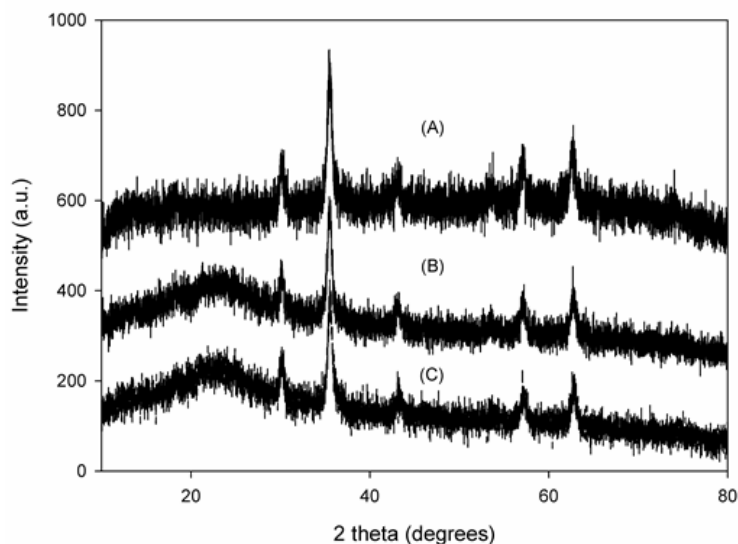

28

29

30

31 Figure S-2 Magnetization curves of (A)  $\text{Fe}_3\text{O}_4$ , (B)  $\text{Fe}_3\text{O}_4/\text{SiO}_2$  and (C)  
32  $\text{Fe}_3\text{O}_4/\text{SiO}_2/\text{TBCD}$ . Inset shows the photographs of (a) dispersion and (b) separation  
33 process of  $\text{Fe}_3\text{O}_4/\text{SiO}_2/\text{TBCD}$ .

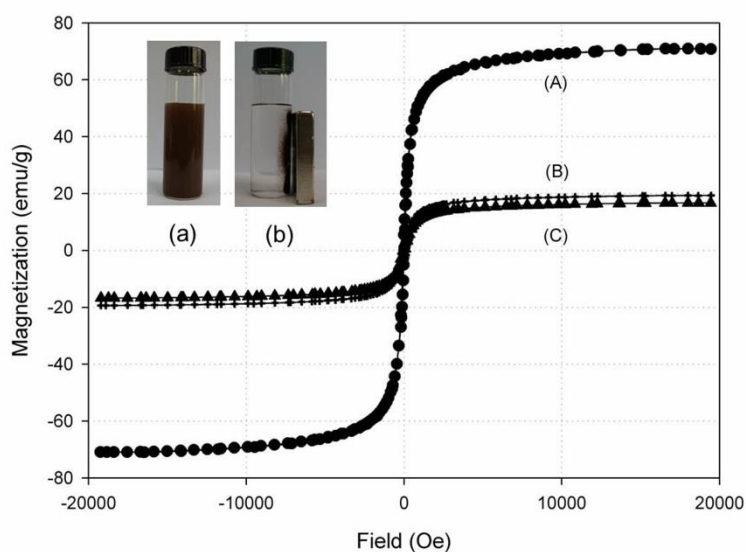

34

35

36 **3.2. Optimization of MSPE parameters**

37 **3.2.5. Effect of ultrasonication and standing time**

38 Figure S-3 Effect of (a) ultrasonication and (b) standing time on recoveries of PAHs.

39 Extraction conditions: sample volume, 200 mL; TBCD-functionalized MNPs, 80 mg ;

40 eluting solvent, acetonitrile; eluent volume, 8 mL; water bath temperature during

41 nitrogen blowing: (a) 30 °C, (b) 40 °C.

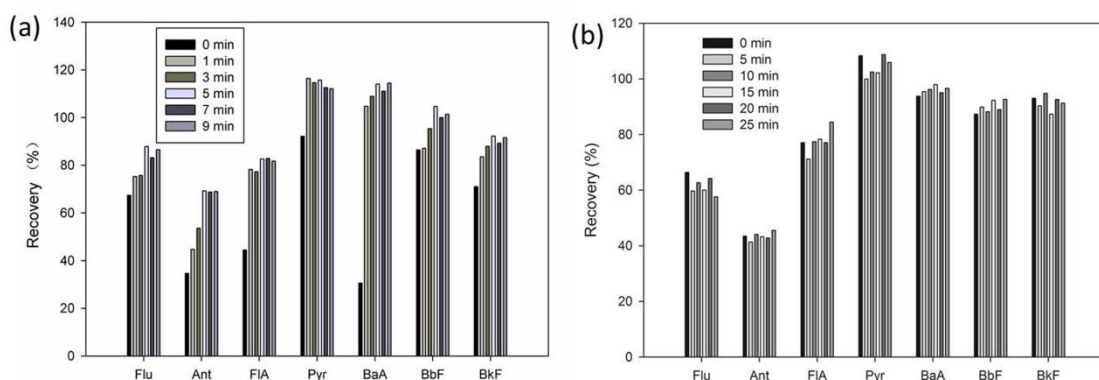

42

43

44

45 **3.4. Application to real water samples**

46 Table S-2 Analytical results of seven PAHs in unspiked real water samples (n=3)

| Analyte | Tap water                               |     | Snow water                              |     | River water                             |     |
|---------|-----------------------------------------|-----|-----------------------------------------|-----|-----------------------------------------|-----|
|         | Detected                                | RSD | Detected                                | RSD | Detected                                | RSD |
|         | concentrations<br>(ng L <sup>-1</sup> ) |     | concentrations<br>(ng L <sup>-1</sup> ) |     | concentrations<br>(ng L <sup>-1</sup> ) |     |
| Flu     | nd                                      | -   | nd                                      | -   | nd                                      | -   |
| Ant     | nd                                      | -   | nd                                      | -   | nd                                      | -   |
| FIA     | nd                                      | -   | nd                                      | -   | 5.0                                     | 3.9 |
| Pyr     | nd                                      | -   | nd                                      | -   | 8.9                                     | 4.3 |
| BaA     | nd                                      | -   | 1.2                                     | 2.3 | 12.0                                    | 2.0 |
| BbF     | nd                                      | -   | nd                                      | -   | 2.9                                     | 6.9 |
| BkF     | nd                                      | -   | 1.1                                     | 7.6 | 1.0                                     | 8.7 |

47 nd - not detected.

48

49 Figure S-4 Chromatograms of PAHs in Xiangjiang river water: (A) unpicked; (B)  
50 picked: 112.5 ng L<sup>-1</sup> Flu, 300 ng L<sup>-1</sup> Ant, 600 ng L<sup>-1</sup> FLA, 300 ng L<sup>-1</sup> Pyr, 112.5 ng L<sup>-1</sup>  
51 BaA, 112.5 ng L<sup>-1</sup> BbF, 30 ng L<sup>-1</sup> BkF. Peaks: (1) Flu; (2) Ant; (3) FLA; (4) Pyr; (5)  
52 BaA; (6) BbF; (7) BkF.

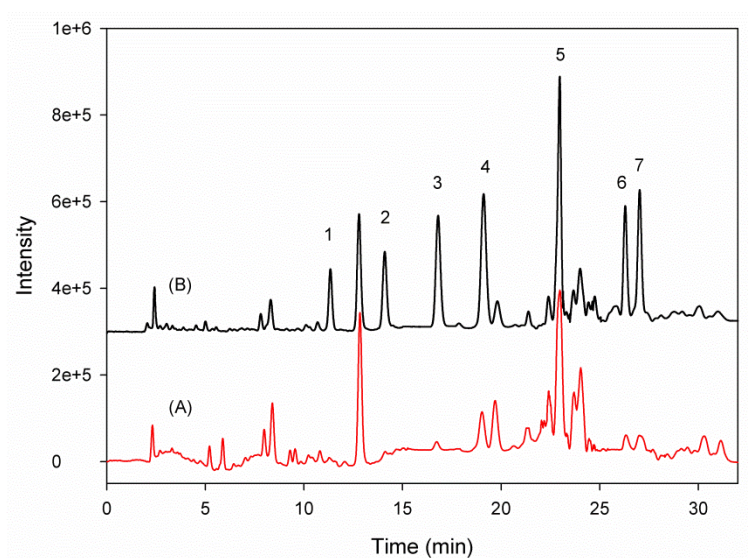

53
